# Supplementary material
Source: publisher figshare collection journal article supplement (https://acs.figshare.com/ndownloader/files/4675312)
Supplement: Supplementary file 1 [file 4675312]

Supporting Information for

**Addition of Oxygen to the Diiron(II/II) Cluster is the Slowest Step in Formation of the Tyrosyl Radical in the W103Y Variant of Ribonucleotide Reductase Protein R2 from Mouse**

Danny Yun, Lana Saleh, Ricardo García-Serres, Brandon M. Chicaese, Young H. An, Boi Hanh Huynh, J. Martin Bollinger, Jr.

**Table S1:** Total "spin" equivalencies and fractions and equivalencies of **X** and Y177• determined through the reconstruction analysis of the EPR spectra (Figure 4).

| reaction time (s) | equiv spin | fraction X | equiv X | fraction Y177• | equiv Y177• | corrected <sup>a</sup> equiv Y177• |
|-------------------|------------|------------|---------|----------------|-------------|------------------------------------|
| 0.017             | 0.11       | 0.40       | 0.042   | 0.60           | 0.063       | 0.01                               |
| 0.074             | 0.18       | 0.49       | 0.089   | 0.51           | 0.092       | 0.02                               |
| 0.15              | 0.25       | 0.33       | 0.084   | 0.67           | 0.17        | 0.11                               |
| 0.50              | 0.47       | 0.12       | 0.056   | 0.88           | 0.41        | 0.35                               |
| 1.0               | 0.59       | 0.05       | 0.029   | 0.95           | 0.56        | 0.50                               |
| 5.0               | 0.81       | 0.02       | 0.016   | 0.98           | 0.79        | 0.73                               |
| 100               | 1.0        | ~ 0        | ~ 0     | 1.0            | 1.0         | 0.94                               |

<sup>a</sup>The [Y177•] in the starting material, which is attributable to a low level of contaminating O<sub>2</sub>, was subtracted from the actual [Y177•] in each sample.

**Figure S1:** Determination of the drop-line corrected molar absorptivity,  $\epsilon_{416} - (\epsilon_{410} + \epsilon_{422})/2$ , for Y177• in mouse R2-W103Y. The concentrations of Y177• in samples of R2-W103Y reconstituted to different extents were determined by EPR, as previously described (1). The values of the drop-line corrected absorbance  $[A_{416} - (A_{410} + A_{422})/2]$  are plotted against  $[Y177\bullet]$  for the same samples. The slope of the linear fit gives  $\epsilon_{416} - (\epsilon_{410} + \epsilon_{422})/2 = (247 \pm 20) \text{ M}^{-1}\text{cm}^{-1}$ . This value depends markedly on the resolution of the spectrometer and was found to be  $(180 \pm 15)$  on the diode array spectrophotometer associated with the stopped-flow apparatus (not shown).

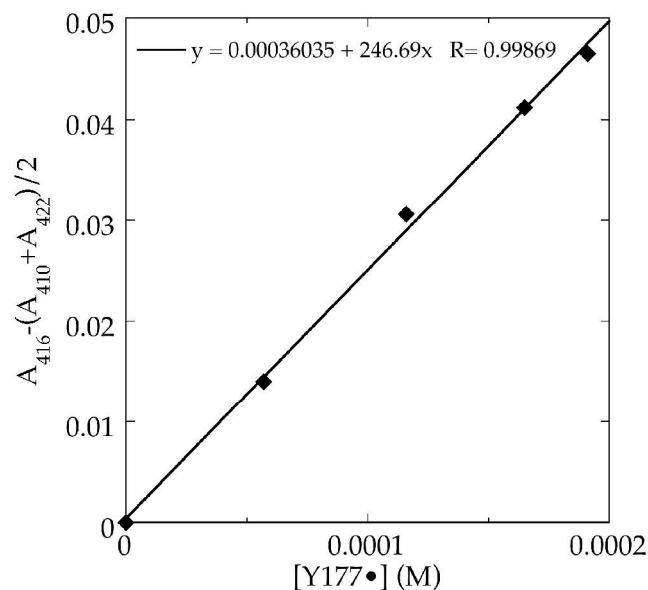

**Figure S2:** Residual errors of the simulations of the inset to Figure 3. The symbol- and color-coding are the same as in Figure 3. Each trace has been offset from zero for ease of visualization.

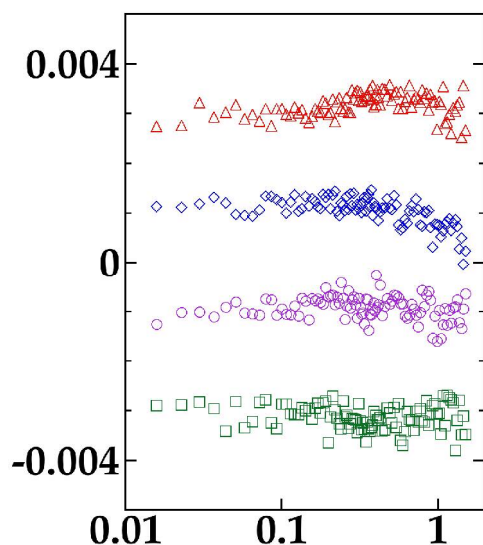

## REFERENCE

1. Bollinger, J. M., Jr., Tong, W. H., Ravi, N., Huynh, B. H., Edmondson, D. E., and Stubbe, J. (1994) Mechanism of assembly of the tyrosyl-diiron(III) cofactor of *E. coli* ribonucleotide reductase. 2. Kinetics of the excess  $\text{Fe}^{2+}$  reaction by optical, EPR, and Mössbauer spectroscopies. *J. Am. Chem. Soc.* 116, 8015-8023.
